# Supplementary material for: Adsorption of Helium and Hydrogen on Triphenylene and 1,3,5-Triphenylbenzene
Source: MDPI journal article supplement (doi:10.3390/molecules27154937), 2022-08-03
Supplement: s1 [file s1]

## Supplementary Material

### Adsorption of Helium and Hydrogen on Triphenylene and 1,3,5-Triphenylbenzene

Stefan Bergmeister<sup>1</sup>, Siegfried Kollotzek<sup>1</sup>, Florent Calvo<sup>2\*</sup>, Elisabeth Gruber<sup>1</sup>, Fabio Zappa<sup>1</sup>, Paul Scheier<sup>1</sup>, Olof Echt<sup>1,3\*</sup>

<sup>1</sup> Institut für Ionenphysik und Angewandte Physik, Universität Innsbruck, A-6020 Innsbruck, Austria

<sup>2</sup> Université Grenoble Alpes, CNRS, LiPhy, F-38000 Grenoble, France

<sup>3</sup> Department of Physics, University of New Hampshire, Durham NH 03824, USA

\* Corresponding authors:

florent.calvo@univ-grenoble-alpes.fr (Florent Calvo), olof.echt@unh.edu (Olof Echt)

Experimental and theoretical results for triphenylene (TPL, C<sub>18</sub>H<sub>12</sub>) and 1,3,5-triphenylbenzene (TPB, C<sub>24</sub>H<sub>18</sub>). The two nearly isoenergetic isomers of TPB<sup>+</sup> are labeled (s) and (a).

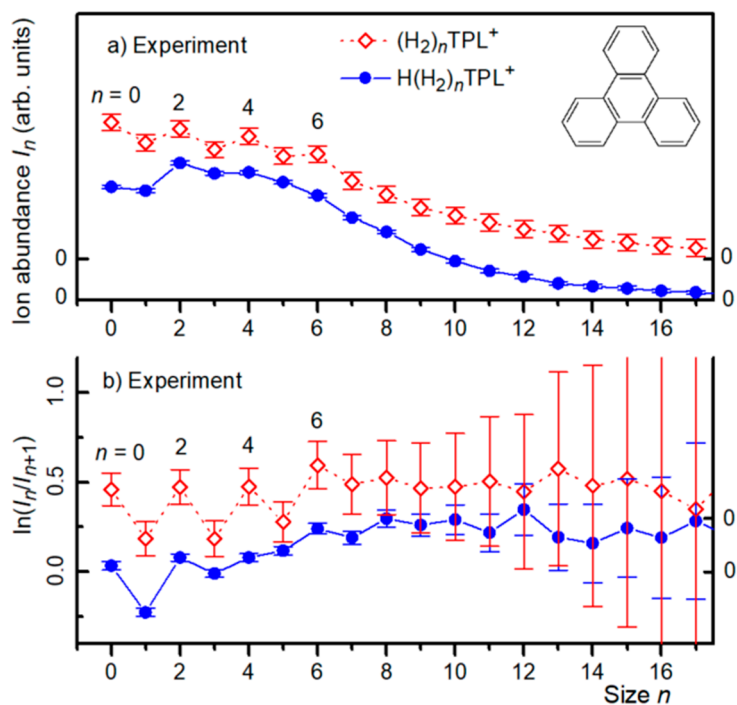

**Figure S1.** Panel a: Ion abundance  $I_n$  of  $(H_2)_nTPL^+$  and  $H(H_2)_nTPL^+$  versus size  $n$ . Panel b: The 1<sup>st</sup> derivative of the logarithm of  $I_n$ . The data sets are stacked for better visibility.

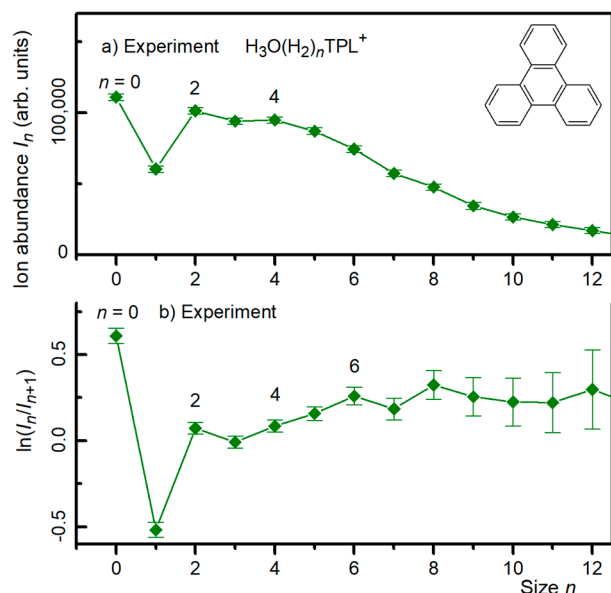

**Figure S2.** Panel a: Ion abundance  $I_n$  of  $\text{H}_3\text{O}(\text{H}_2)_n\text{TPB}^+$  versus size  $n$ . Panel b: The 1<sup>st</sup> derivative of  $\ln I_n$ .

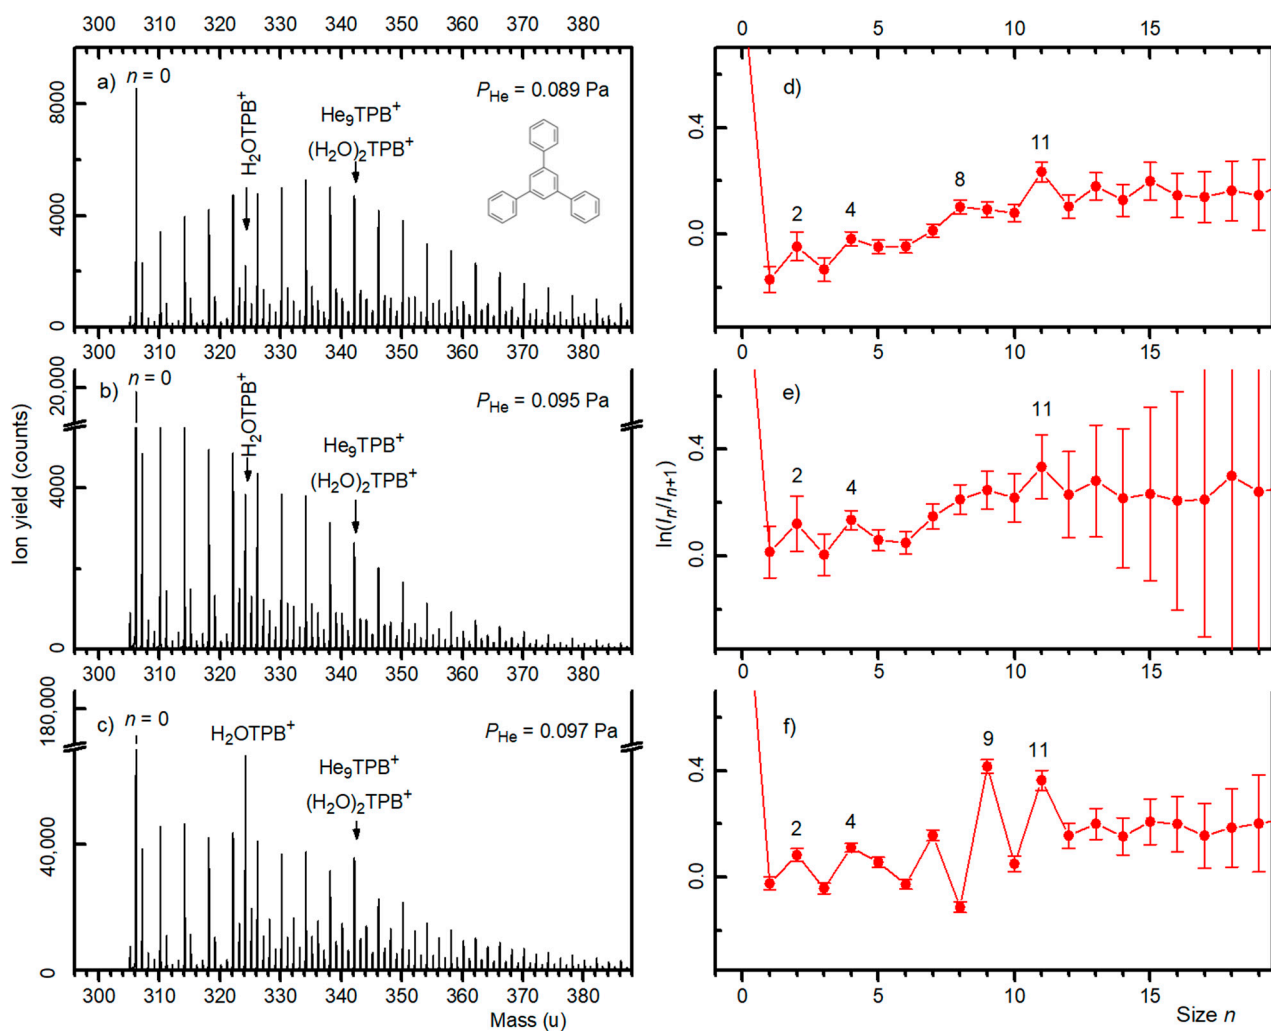

**Figure S3.** Panels a, b, c: Mass spectra of 1,3,5-triphenylbenzene (TPB,  $\text{C}_{24}\text{H}_{18}$ , mass 306.141 u) complexed with helium. The  $\text{H}_2\text{OTPB}^+$  mass peak shows that the degree of water contamination increases from a to c. Panels d, e, f: The first derivatives of the logarithm of the ion abundance extracted from the respective mass spectra shown on the left. The local maximum at  $n = 9$  in panel f is due to the strong contribution of  $(\text{H}_2\text{O})_2\text{TPB}^+$  which cannot be distinguished from the  $\text{He}_9\text{TPB}^+$  mass peak, but this contribution becomes negligible in panel d as the degree of water contamination decreases.

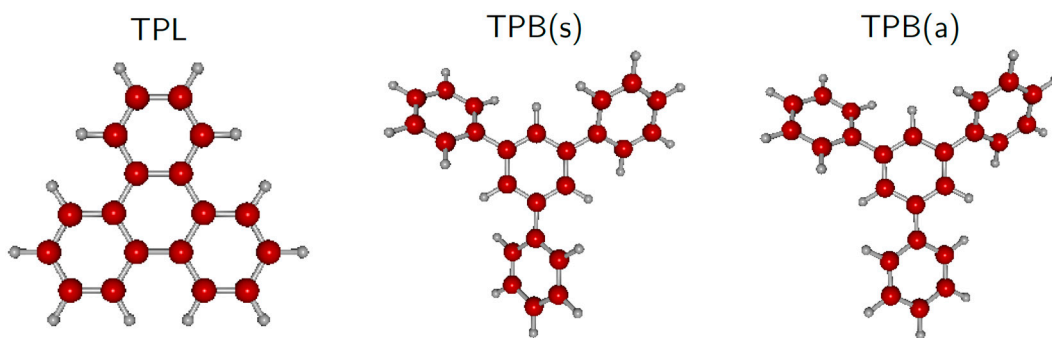

**Figure S4.** Calculated structures of cationic TPL (planar), and the two non-planar isomers of TPB.

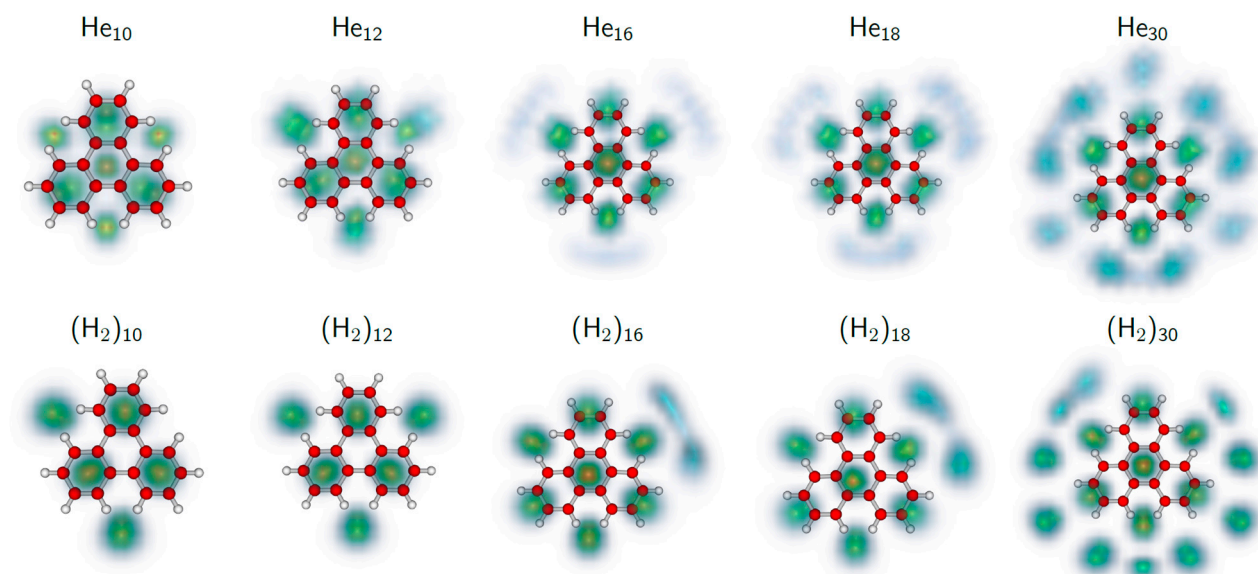

**Figure S5.** Selected structures of  $\text{He}_n\text{TPL}^+$  and  $(\text{H}_2)_n\text{TPL}^+$  clusters with  $n = 10, 12, 16, 18,$  and  $30$ . For each size, the He and  $\text{H}_2$  densities obtained from the PIMD simulations are superimposed on the structure of  $\text{TPL}^+$ .

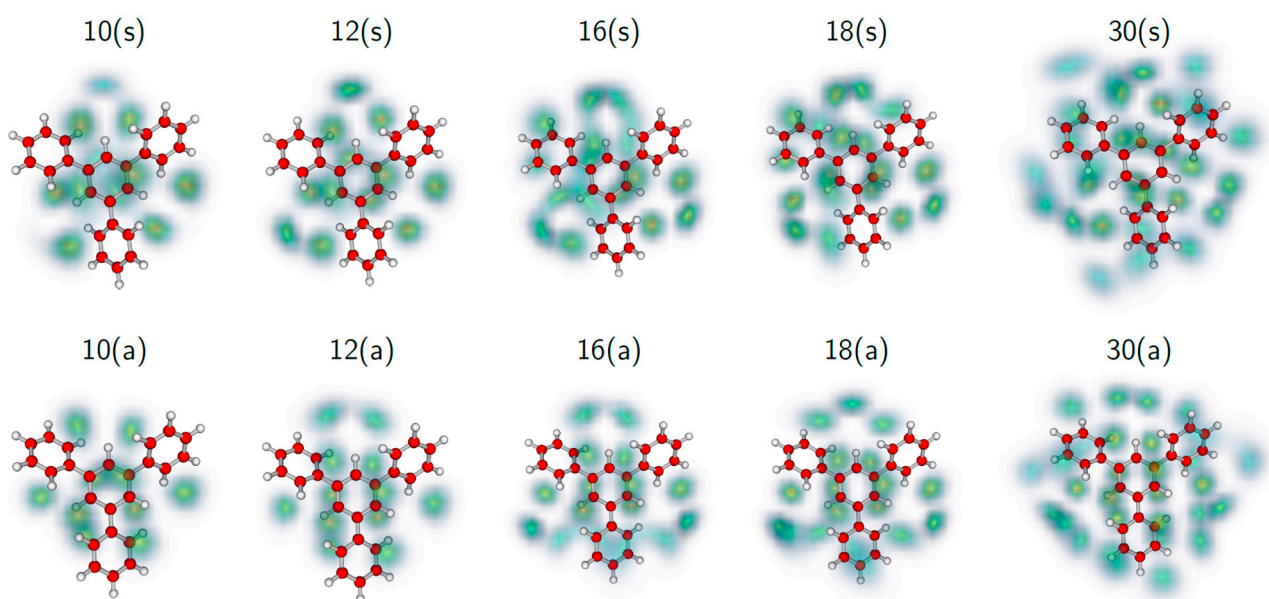

**Figure S6.** Selected structures of  $\text{He}_n\text{TPB}^+$  clusters with  $n = 10, 12, 16, 18,$  and  $30$ , for isomers (s) and (a). For each size, the He densities obtained from the PIMD simulations are superimposed on the structure of  $\text{TPB}^+$ .  $10(\text{s})$  denotes  $\text{He}_{10}\text{TPB}(\text{s})^+$ , etc.

**Table S1.** Cartesian coordinates ( $x,y,z$ ) and partial charge ( $q$ ) on each atom of the bare hydrocarbon ion computed with the DFT/wB97xD/6-31+G\* method.

**Triphenylene TPL<sup>+</sup>**

|   | $x$       | $y$       | $z$      | $q$       |
|---|-----------|-----------|----------|-----------|
| C | 1.435823  | 0.005108  | 0.000000 | 0.127033  |
| C | 0.706972  | 1.273432  | 0.000000 | -0.007716 |
| C | -0.706972 | 1.273432  | 0.000000 | -0.007716 |
| C | -1.435823 | 0.005108  | 0.000000 | 0.127033  |
| C | -0.710788 | -1.244503 | 0.000000 | 0.084518  |
| C | 0.710788  | -1.244503 | 0.000000 | 0.084518  |
| C | 2.834163  | -0.044914 | 0.000000 | -0.237909 |
| C | 1.382609  | 2.502772  | 0.000000 | -0.091613 |
| C | -1.382609 | 2.502772  | 0.000000 | -0.091613 |
| C | -2.834163 | -0.044914 | 0.000000 | -0.237909 |
| C | -1.456158 | -2.471008 | 0.000000 | -0.148277 |
| C | 1.456158  | -2.471008 | 0.000000 | -0.148277 |
| C | 0.694465  | 3.711162  | 0.000000 | -0.098722 |
| C | -0.694465 | 3.711162  | 0.000000 | -0.098722 |
| C | -2.821726 | -2.477326 | 0.000000 | -0.137357 |
| C | 2.821726  | -2.477326 | 0.000000 | -0.137357 |
| C | -3.518169 | -1.249832 | 0.000000 | 0.074069  |
| C | 3.518169  | -1.249832 | 0.000000 | 0.074069  |
| H | -3.367187 | -3.414628 | 0.000000 | 0.165842  |
| H | 3.367187  | -3.414628 | 0.000000 | 0.165842  |
| H | 2.464760  | 2.541461  | 0.000000 | 0.141797  |
| H | -2.464760 | 2.541461  | 0.000000 | 0.141797  |
| H | -4.603876 | -1.246213 | 0.000000 | 0.138686  |
| H | -0.940704 | -3.421492 | 0.000000 | 0.163753  |
| H | 0.940704  | -3.421492 | 0.000000 | 0.163753  |
| H | 4.603876  | -1.246213 | 0.000000 | 0.138686  |
| H | 3.417729  | 0.866154  | 0.000000 | 0.167297  |
| H | 1.246141  | 4.645373  | 0.000000 | 0.158599  |
| H | -1.246141 | 4.645373  | 0.000000 | 0.158599  |
| H | -3.417729 | 0.866154  | 0.000000 | 0.167297  |

**1,3,5-triphenylbenzene TPB(s)<sup>+</sup>**

|   |           |           |           |           |
|---|-----------|-----------|-----------|-----------|
| C | 0.595686  | 1.303911  | -0.002677 | 0.095249  |
| C | -1.413338 | -0.091574 | 0.035623  | -0.079394 |
| C | 0.848501  | -1.128688 | -0.031828 | -0.034756 |
| C | -0.821488 | 1.154509  | 0.054149  | -0.076271 |
| C | 1.406184  | 0.132773  | -0.057453 | -0.106144 |
| C | -0.566155 | -1.228065 | 0.005220  | 0.119711  |
| C | 1.198721  | 2.615524  | -0.003488 | 0.038678  |
| C | -2.882571 | -0.260280 | 0.022923  | 0.101480  |
| C | 1.679702  | -2.351236 | -0.019267 | 0.059581  |
| C | 2.498214  | 2.821598  | -0.543632 | 0.012182  |
| C | -3.683924 | 0.584288  | -0.756958 | -0.138572 |
| C | 2.860622  | -2.394571 | 0.734119  | -0.118425 |
| C | 0.512951  | 3.737098  | 0.539592  | -0.164864 |
| C | -3.490666 | -1.264224 | 0.788427  | -0.157242 |
| C | 1.301272  | -3.478360 | -0.761660 | -0.144457 |
| C | 3.069270  | 4.077980  | -0.549411 | -0.033022 |
| C | -5.065685 | 0.429153  | -0.767951 | -0.133514 |

|   |           |           |           |           |
|---|-----------|-----------|-----------|-----------|
| C | 3.648653  | -3.540066 | 0.740809  | -0.158424 |
| C | 1.101932  | 4.985161  | 0.553475  | -0.138522 |
| C | -4.873272 | -1.411276 | 0.781885  | -0.137821 |
| C | 2.095743  | -4.619469 | -0.759485 | -0.136842 |
| C | 2.378249  | 5.163476  | 0.004214  | -0.057884 |
| C | -5.662819 | -0.566912 | 0.002576  | -0.089108 |
| C | 3.269363  | -4.652927 | -0.007988 | -0.089591 |
| H | -1.453883 | 2.034681  | 0.081633  | 0.132387  |
| H | 2.485305  | 0.227819  | -0.092400 | 0.143667  |
| H | -1.019486 | -2.215546 | 0.009276  | 0.104006  |
| H | 3.034156  | 1.998257  | -1.002389 | 0.103914  |
| H | -3.224093 | 1.341552  | -1.386904 | 0.127326  |
| H | 3.147112  | -1.543624 | 1.346922  | 0.121114  |
| H | -0.462857 | 3.610301  | 0.995162  | 0.164896  |
| H | -2.888204 | -1.913663 | 1.418672  | 0.138334  |
| H | 0.401002  | -3.457621 | -1.370947 | 0.133786  |
| H | 4.050956  | 4.225371  | -0.986895 | 0.115377  |
| H | -5.676179 | 1.078765  | -1.387204 | 0.152722  |
| H | 4.555019  | -3.567673 | 1.337534  | 0.162166  |
| H | 0.577949  | 5.827492  | 0.992592  | 0.181239  |
| H | -5.335612 | -2.183159 | 1.389009  | 0.157465  |
| H | 1.800723  | -5.482052 | -1.348675 | 0.157389  |
| H | 2.834324  | 6.148618  | 0.007235  | 0.172696  |
| H | -6.741404 | -0.688935 | -0.007746 | 0.148545  |
| H | 3.884305  | -5.547540 | -0.002155 | 0.150941  |

### 1,3,5-triphenylbenzene TPB(a)<sup>+</sup>

|   |           |           |           |           |
|---|-----------|-----------|-----------|-----------|
| C | 0.051522  | -1.434786 | 0.010963  | -0.250470 |
| C | -1.269371 | 0.624120  | -0.032158 | -0.384564 |
| C | 1.216357  | 0.717422  | 0.051176  | -0.384565 |
| C | -1.201021 | -0.754391 | -0.023621 | 0.207332  |
| C | 1.250270  | -0.662321 | 0.046021  | 0.207338  |
| C | -0.051465 | 1.349864  | 0.009023  | 0.493514  |
| C | 0.106250  | -2.877115 | 0.006044  | 0.309730  |
| C | -2.558496 | 1.344722  | -0.082626 | 0.325885  |
| C | 2.450656  | 1.529706  | 0.090665  | 0.325879  |
| C | 1.267390  | -3.563372 | -0.444949 | -0.205426 |
| C | -3.656340 | 0.888558  | 0.659604  | -0.280277 |
| C | 3.569787  | 1.151994  | -0.663529 | -0.280271 |
| C | -0.999965 | -3.653887 | 0.448573  | -0.205418 |
| C | -2.700499 | 2.490070  | -0.878230 | -0.333282 |
| C | 2.518913  | 2.682899  | 0.884300  | -0.333274 |
| C | 1.311217  | -4.942791 | -0.462914 | -0.104874 |
| C | -4.871588 | 1.561761  | 0.602980  | -0.074061 |
| C | 4.734650  | 1.910062  | -0.621433 | -0.074064 |
| C | -0.939677 | -5.032837 | 0.449764  | -0.104879 |
| C | -3.919223 | 3.155994  | -0.939637 | -0.040304 |
| C | 3.687918  | 3.434129  | 0.931073  | -0.040307 |
| C | 0.211719  | -5.683706 | -0.011302 | 0.029639  |
| C | -5.005896 | 2.694339  | -0.198554 | -0.104249 |
| C | 4.796482  | 3.050351  | 0.177946  | -0.104249 |
| H | -2.118926 | -1.322900 | -0.121129 | 0.011112  |
| H | 2.207482  | -1.161606 | 0.143964  | 0.011109  |
| H | -0.092322 | 2.435850  | 0.008023  | -0.086156 |
| H | 2.116067  | -3.005968 | -0.825022 | 0.200318  |
| H | -3.550797 | 0.024997  | 1.311454  | 0.187325  |
| H | 3.518678  | 0.282233  | -1.313770 | 0.187323  |
| H | -1.887894 | -3.166537 | 0.835356  | 0.200314  |

|   |           |           |           |          |
|---|-----------|-----------|-----------|----------|
| H | -1.868099 | 2.845880  | -1.480278 | 0.218861 |
| H | 1.669643  | 2.979324  | 1.495023  | 0.218858 |
| H | 2.195163  | -5.452078 | -0.831737 | 0.152385 |
| H | -5.711793 | 1.208573  | 1.192536  | 0.136017 |
| H | 5.591254  | 1.616732  | -1.220222 | 0.136018 |
| H | -1.782771 | -5.611931 | 0.811247  | 0.152387 |
| H | -4.022244 | 4.033764  | -1.569723 | 0.128401 |
| H | 3.735253  | 4.317861  | 1.559575  | 0.128402 |
| H | 0.252691  | -6.768588 | -0.018354 | 0.139117 |
| H | -5.955455 | 3.218416  | -0.242795 | 0.141711 |
| H | 5.706527  | 3.641271  | 0.210790  | 0.141712 |

**Table S2.** Computed energies versus size  $n$  for  $\text{He}_n\text{TPL}^+$ ,  $(\text{H}_2)_n\text{TPL}^+$ ,  $(\text{He})_n\text{TPB(s)}^+$ , and  $(\text{He})_n\text{TPB(a)}^+$ . Classical energies  $E_c$  are listed in meV per atom; total quantum energies  $E_q$  are listed in hartree.

| <b><math>\text{He}_n\text{TPL}^+</math></b> |               |              |
|---------------------------------------------|---------------|--------------|
| $n$                                         | $E_c/n$ (meV) | $E_q$ (har)  |
| 0                                           | 0             | 0            |
| 1                                           | -20.8614      | -0.000547358 |
| 2                                           | -20.8678      | -0.001095238 |
| 3                                           | -19.69607     | -0.001514117 |
| 4                                           | -19.4648      | -0.001936031 |
| 5                                           | -19.05378     | -0.002348133 |
| 6                                           | -19.00149     | -0.002771806 |
| 7                                           | -18.77591     | -0.003121484 |
| 8                                           | -18.60826     | -0.003481267 |
| 9                                           | -18.40244     | -0.003809949 |
| 10                                          | -18.315       | -0.00414966  |
| 11                                          | -18.2363      | -0.00447712  |
| 12                                          | -18.11477     | -0.004803059 |
| 13                                          | -18.04015     | -0.005096007 |
| 14                                          | -18.02801     | -0.005393754 |
| 15                                          | -17.60911     | -0.005614286 |
| 16                                          | -17.2611      | -0.00583146  |
| 17                                          | -16.98442     | -0.006048502 |
| 18                                          | -16.69997     | -0.006266072 |
| 19                                          | -16.46539     | -0.006475996 |
| 20                                          | -16.27226     | -0.006681098 |
| 21                                          | -16.06232     | -0.006915579 |
| 22                                          | -15.86881     | -0.007132551 |
| 23                                          | -15.71507     | -0.007341397 |
| 24                                          | -15.55713     | -0.007540491 |
| 25                                          | -15.42019     | -0.007747757 |
| 26                                          | -15.30321     | -0.007981299 |
| 27                                          | -15.18128     | -0.008187127 |
| 28                                          | -15.05327     | -0.00838678  |
| 29                                          | -14.96136     | -0.008584397 |
| 30                                          | -14.85699     | -0.008783918 |
| 31                                          | -14.76973     | -0.008987686 |
| 32                                          | -14.69859     | -0.009160633 |
| 33                                          | -14.61674     | -0.009357977 |
| 34                                          | -14.54055     | -0.009549094 |
| 35                                          | -14.46776     | -0.009735707 |
| 36                                          | -14.39982     | -0.009875835 |
| 37                                          | -14.33292     | -0.010032477 |
| 38                                          | -14.26869     | -0.010185185 |
| 39                                          | -14.20259     | -0.010345545 |
| 40                                          | -14.14297     | -0.010482762 |
| 41                                          | -14.07954     | -0.010631475 |
| 42                                          | -14.01935     | -0.010763064 |
| 43                                          | -13.96323     | -0.010922564 |
| 44                                          | -13.90885     | -0.011073517 |
| 45                                          | -13.81266     | -0.011198673 |
| 46                                          | -13.71906     | -0.011309316 |
| 47                                          | -13.64911     | -0.011392151 |
| 48                                          | -13.56403     | -0.011510629 |
| 49                                          | -13.4208      | -0.011581119 |
| 50                                          | -13.27184     | -0.011695085 |

**(H<sub>2</sub>)<sub>n</sub>TPL<sup>+</sup>**

| 0  | 0         | 0            |
|----|-----------|--------------|
| 1  | -40.24004 | -0.001058501 |
| 2  | -40.30707 | -0.002124176 |
| 3  | -37.60574 | -0.002881821 |
| 4  | -37.29356 | -0.003680061 |
| 5  | -36.44824 | -0.004434703 |
| 6  | -36.32933 | -0.005242985 |
| 7  | -35.87962 | -0.005923754 |
| 8  | -35.56582 | -0.006606863 |
| 9  | -35.12638 | -0.007260163 |
| 10 | -34.79599 | -0.007914293 |
| 11 | -34.49945 | -0.008544275 |
| 12 | -34.27163 | -0.009194343 |
| 13 | -34.02196 | -0.009736447 |
| 14 | -33.81364 | -0.010283942 |
| 15 | -33.1184  | -0.010770767 |
| 16 | -32.58979 | -0.011245971 |
| 17 | -32.25266 | -0.011770618 |
| 18 | -31.97745 | -0.01221868  |
| 19 | -31.67447 | -0.012694915 |
| 20 | -31.27861 | -0.013229421 |
| 21 | -31.04275 | -0.01372147  |
| 22 | -30.79104 | -0.014255316 |
| 23 | -30.59975 | -0.014789229 |
| 24 | -30.41743 | -0.015253224 |
| 25 | -30.2241  | -0.015688048 |
| 26 | -30.07839 | -0.016136315 |
| 27 | -29.91596 | -0.016675612 |
| 28 | -29.72058 | -0.01715919  |
| 29 | -29.59808 | -0.017682648 |
| 30 | -29.51212 | -0.018235005 |
| 31 | -29.4352  | -0.018663137 |
| 32 | -29.36148 | -0.019121178 |
| 33 | -29.20547 | -0.019585011 |
| 34 | -29.0972  | -0.020031517 |
| 35 | -28.97675 | -0.020484282 |
| 36 | -28.8966  | -0.020851754 |
| 37 | -28.78175 | -0.021121692 |
| 38 | -28.71519 | -0.02147632  |
| 39 | -28.61449 | -0.021782685 |
| 40 | -28.54809 | -0.022057304 |
| 41 | -28.44066 | -0.022304596 |
| 42 | -28.33947 | -0.02257148  |
| 43 | -28.22472 | -0.022845181 |
| 44 | -28.11197 | -0.023170903 |
| 45 | -27.98912 | -0.023434787 |
| 46 | -27.87192 | -0.023786507 |
| 47 | -27.64538 | -0.024156059 |
| 48 | -27.48738 | -0.024503527 |
| 49 | -27.38248 | -0.024823783 |
| 50 | -27.22774 | -0.025167675 |



**He<sub>n</sub>TPB(s)<sup>+</sup>**

| 0  | 0         | 0            |
|----|-----------|--------------|
| 1  | -20.25989 | -0.00054031  |
| 2  | -20.19602 | -0.001079057 |
| 3  | -19.88823 | -0.00155473  |
| 4  | -19.71468 | -0.002023737 |
| 5  | -19.49996 | -0.00247013  |
| 6  | -19.44152 | -0.002918442 |
| 7  | -19.37681 | -0.003319861 |
| 8  | -19.29294 | -0.003804082 |
| 9  | -19.26078 | -0.004209689 |
| 10 | -19.22748 | -0.004615411 |
| 11 | -19.10319 | -0.004963977 |
| 12 | -18.99952 | -0.005322297 |
| 13 | -18.71795 | -0.00565743  |
| 14 | -18.47312 | -0.006002205 |
| 15 | -18.25814 | -0.006275776 |
| 16 | -18.06871 | -0.006554958 |
| 17 | -17.89327 | -0.006843786 |
| 18 | -17.74694 | -0.007098658 |
| 19 | -17.5849  | -0.007353675 |
| 20 | -17.41127 | -0.007585567 |
| 21 | -17.26454 | -0.007819499 |
| 22 | -17.1199  | -0.008067557 |
| 23 | -16.95913 | -0.008305041 |
| 24 | -16.84283 | -0.008523977 |
| 25 | -16.68633 | -0.008749012 |
| 26 | -16.56762 | -0.008965266 |
| 27 | -16.42997 | -0.009190869 |
| 28 | -16.2856  | -0.009399621 |
| 29 | -16.16124 | -0.009614626 |
| 30 | -16.03207 | -0.009826197 |
| 31 | -15.92527 | -0.010016702 |
| 32 | -15.81474 | -0.010182927 |
| 33 | -15.68559 | -0.010365035 |
| 34 | -15.55049 | -0.010545762 |
| 35 | -15.42257 | -0.010731735 |
| 36 | -15.31755 | -0.010935995 |
| 37 | -15.21804 | -0.011093011 |
| 38 | -15.11973 | -0.011238642 |
| 39 | -15.01864 | -0.011421468 |
| 40 | -14.91153 | -0.011600522 |
| 41 | -14.82867 | -0.011776797 |
| 42 | -14.74237 | -0.011963397 |
| 43 | -14.65755 | -0.012145241 |
| 44 | -14.55821 | -0.012294772 |
| 45 | -14.47977 | -0.012431973 |
| 46 | -14.41018 | -0.012575623 |
| 47 | -14.34153 | -0.012726256 |
| 48 | -14.25415 | -0.012873228 |
| 49 | -14.15988 | -0.012989036 |
| 50 | -14.05928 | -0.013116044 |

**He<sub>n</sub>TPB(a)<sup>+</sup>**

| 0  | 0         | 0            |
|----|-----------|--------------|
| 1  | -20.28374 | -0.000539961 |
| 2  | -20.26738 | -0.001079358 |
| 3  | -20.0355  | -0.001562377 |
| 4  | -19.88693 | -0.002038663 |
| 5  | -19.79804 | -0.002520117 |
| 6  | -19.72399 | -0.002990341 |
| 7  | -19.58014 | -0.003471211 |
| 8  | -19.49645 | -0.003933237 |
| 9  | -19.39623 | -0.004312556 |
| 10 | -19.32511 | -0.004680517 |
| 11 | -19.18438 | -0.005045411 |
| 12 | -19.06338 | -0.005398148 |
| 13 | -18.82949 | -0.005748929 |
| 14 | -18.64146 | -0.006070642 |
| 15 | -18.45978 | -0.006370628 |
| 16 | -18.32106 | -0.006659893 |
| 17 | -18.16581 | -0.006935685 |
| 18 | -18.05753 | -0.00718876  |
| 19 | -17.8792  | -0.007427514 |
| 20 | -17.70557 | -0.007666182 |
| 21 | -17.49769 | -0.007895204 |
| 22 | -17.33455 | -0.008132428 |
| 23 | -17.16856 | -0.008351251 |
| 24 | -17.03438 | -0.008566937 |
| 25 | -16.8911  | -0.008773608 |
| 26 | -16.75173 | -0.008993611 |
| 27 | -16.6077  | -0.009190753 |
| 28 | -16.47079 | -0.009391346 |
| 29 | -16.31821 | -0.009611487 |
| 30 | -16.18441 | -0.009797021 |
| 31 | -16.05933 | -0.010006887 |
| 32 | -15.94234 | -0.010189926 |
| 33 | -15.81885 | -0.010377213 |
| 34 | -15.70003 | -0.010550935 |
| 35 | -15.56152 | -0.010746968 |
| 36 | -15.43884 | -0.010927416 |
| 37 | -15.31539 | -0.011119454 |
| 38 | -15.206   | -0.011302577 |
| 39 | -15.09393 | -0.011461063 |
| 40 | -14.99226 | -0.011622474 |
| 41 | -14.89381 | -0.011803469 |
| 42 | -14.79963 | -0.011948913 |
| 43 | -14.70622 | -0.01212256  |
| 44 | -14.61358 | -0.012277795 |
| 45 | -14.52531 | -0.012435072 |
| 46 | -14.43951 | -0.012592955 |
| 47 | -14.35404 | -0.012733614 |
| 48 | -14.26712 | -0.012879992 |
| 49 | -14.18234 | -0.013044311 |
| 50 | -14.09481 | -0.013185838 |
